# Supplementary material
Source: publisher figshare collection journal article supplement (https://frontiersin.figshare.com/ndownloader/files/31879844)
Supplement: Supplementary file [file 31879844]

## **SUPPLEMENTARY MATERIAL**

**TITLE:** Neutrophil expression of T and B immunomodulatory molecules in HIV infection

**SHORT TITLE:** Neutrophils in HIV infection

**AUTHORS:** Mercedes Márquez-Coello <sup>1</sup>, Cristina Ruiz Sánchez <sup>1</sup>, Andrés Martín-Aspas <sup>1</sup>, Clotilde Fernández Gutiérrez Del Álamo <sup>2</sup>, Francisco Illanes-Álvarez <sup>1</sup>, Sara Cuesta-Sancho <sup>1†</sup>, José-Antonio Girón-González <sup>1†</sup>.

<sup>1</sup>. Unidad de Enfermedades Infecciosas, Servicio de Medicina Interna, Hospital Universitario Puerta del Mar, Facultad de Medicina, Universidad de Cádiz, Cádiz, Spain. Instituto de Investigación e Innovación en Ciencias Biomédicas de Cádiz (INiBICA)

<sup>2</sup> Servicio de Microbiología, Hospital Universitario Puerta del Mar, Facultad de Medicina, Universidad de Cádiz, Cádiz, Spain. Instituto de Investigación e Innovación en Ciencias Biomédicas de Cádiz (INiBICA)

<sup>†</sup> These authors have contributed equally to this work and share last authorship.

## Supplementary figures

### FIGURE LEGENDS

Supplementary FIGURE 1. **Gating strategy.** Gating strategy of polymorphonuclear neutrophils (PMN) based on (A) forward (FSC-H) and side (SSC-H) scatter, the gate is the PMN. A dot plot was made and CD15+ (FL3) and CD14- (FL4) cells were selected without (B) and with antibodies (C). Then, PMNs were characterized by anti-CD16 (FL1). They have been shown without and with antibody in (D) and (E) graphs. An overlay was made to visualize both populations (F).

Supplementary FIGURE 2. **Representative figure of polymorphonuclear (PMN) expression of IL-6 and T cell-modulating markers in a healthy individual and HIV infected patient.** PMNs were gated based on forward (FSC-H) and side (SSC-H) scatter for determination of granulocyte populations. In this gate, CD15+CD16+ cells were selected. (A) Anti-human IL-6 phycoerythrin conjugated (PE). (B) Anti-human arginase-1 fluorescent isocyanate conjugated (FITC). (C) Anti-human PDL-1 PE conjugated. (D) Anti-human IL-10 PE conjugated.

Supplementary FIGURE 3. **Representative figure of polymorphonuclear (PMN) expression of B cell-modulating markers in a healthy individual and HIV patient.** PMNs were gated based on forward (FSC-H) and side (SSC-H) scatter for determination of granulocyte populations. In this gate, CD15+CD16+ cells were selected. Markers are plotted on the X-axis of the histogram. (A) Anti-human BAFF phycoerythrin conjugated (PE). (B) Anti-human APRIL phycoerythrin conjugated (PE) conjugated.
